# Supplementary material for: Sensitivity, Specificity, and Public-Health Utility of Clinical Case Definitions Based on the Signs and Symptoms of Cholera in Africa
Source: PubMed Central journal article supplement (PMC5928804; doi:10.4269/ajtmh.16-0523), 2018-02-26
Supplement: tpmd160523.SD1.pdf [file tpmd160523.SD1.pdf]

SUPPLEMENTAL TABLE 1  
Sensitivity, specificity, PPV, and NPV for tested cases aged more than 5 years in Côte d'Ivoire

| Case definition                                                           | Sensitivity % (95% CI) | Specificity % (95% CI) | PPV % (95% CI)    | NPV % (95% CI)   |
|---------------------------------------------------------------------------|------------------------|------------------------|-------------------|------------------|
| World Health Organization epidemic cholera definition                     | 87.5 (73.2–95.8)       | 8.8 (3.6–17.2)         | 32.4 (23.7–42.1)  | 58.3 (27.7–84.8) |
| Watery stool and dehydration                                              | 72.0 (50.6–87.9)       | 37.0 (24.3–51.3)       | 34.6 (22.0–49.1)  | 74.1 (53.7–88.9) |
| Watery stool and vomiting                                                 | 82.1 (63.1–93.9)       | 16.9 (8.4–29.0)        | 31.9 (21.4–44.0)  | 66.7 (38.4–88.2) |
| Watery stool and ≤ 9 stools in the last 24 hours                          | 47.1 (23.0–72.2)       | 58.7 (43.2–73.0)       | 29.6 (13.8–50.2)  | 75.0 (57.8–87.9) |
| Watery stool and (10–25) stools in the last 24 hours                      | 52.9 (27.8–77.0)       | 43.5 (28.9–58.9)       | 25.7 (12.5–43.3)  | 71.4 (51.3–86.8) |
| Watery stool and dry mucous membranes                                     | 30.8 (9.1–61.4)        | 59.5 (42.1–75.2)       | 21.1 (6.1–45.6)   | 71.0 (52.0–85.8) |
| Watery stool and dehydration and vomiting                                 | 73.9 (51.6–89.8)       | 44.4 (30.9–58.6)       | 36.2 (22.7–51.5)  | 80.0 (61.4–92.3) |
| Watery stool and dehydration and ≤ 9 stools in the last 24 hours          | 36.4 (10.9–69.2)       | 83.3 (62.6–95.3)       | 50.0 (15.7–84.3)  | 74.1 (53.7–88.9) |
| Watery stool and dehydration and (10–25) stools in the last 24 hours      | 41.2 (18.4–67.1)       | 63.3 (49.9–75.4)       | 24.1 (10.3–43.5)  | 79.2 (65.0–89.5) |
| Watery stool and (dehydration or vomiting)                                | 91.7 (73.0–99.0)       | 9.3 (3.1–20.3)         | 31.0 (20.5–43.1)  | 71.4 (29.0–96.3) |
| Watery stool and (dehydration or rice water stools)                       | 84.0 (63.9–95.5)       | 25.5 (14.3–39.6)       | 35.6 (23.6–49.1)  | 76.5 (50.1–93.2) |
| Watery stool and (dehydration or rice water stools or vomiting)           | 91.7 (73.0–99.0)       | 9.8 (3.3–21.4)         | 32.4 (21.5–44.8)  | 71.4 (29.0–96.3) |
| Watery stool and vomiting and dry mucous membranes                        | 30.8 (9.1–61.4)        | 59.5 (42.1–75.2)       | 21.1 (6.1–45.6)   | 71.0 (52.0–85.8) |
| Rice water stools                                                         | 28.2 (15.0–44.9)       | 74.3 (62.8–83.8)       | 36.7 (19.9–56.1)  | 66.3 (55.1–76.3) |
| Rice water stools and dehydration                                         | 20.0 (6.8–40.7)        | 77.4 (63.8–87.7)       | 29.4 (10.3–56.0)  | 67.2 (54.0–78.7) |
| Rice water stools and vomiting                                            | 28.6 (13.2–48.7)       | 71.9 (58.5–83.0)       | 33.3 (15.6–55.3)  | 67.2 (54.0–78.7) |
| Rice water stools and ≤ 9 stools in the last 24 hours                     | 5.9 (0.1–28.7)         | 95.5 (84.5–99.4)       | 33.3 (0.8–90.6)   | 72.4 (59.1–83.3) |
| Rice water stools and (10–25) stools in the last 24 hours                 | 29.4 (10.3–56.0)       | 79.5 (64.7–90.2)       | 35.7 (12.8–64.9)  | 74.5 (59.7–86.1) |
| Rice water stools and dry mucous membranes                                | 15.4 (1.9–45.4)        | 83.8 (68.0–93.8)       | 25.0 (3.2–65.1)   | 73.8 (58.0–86.1) |
| Rice water stools and dehydration and vomiting                            | 20.8 (7.1–42.2)        | 81.1 (68.0–90.6)       | 33.3 (11.8–61.6)  | 69.4 (56.3–80.4) |
| Rice water stools and dehydration and ≤ 9 stools in the last 24 hours     | 8.3 (0.2–38.5)         | 100.0 (89.1–100.0)     | 100.0 (2.5–100.0) | 74.4 (58.8–86.5) |
| Rice water stools and dehydration and (10–25) stools in the last 24 hours | 18.8 (4.0–45.6)        | 83.3 (69.8–92.5)       | 27.3 (6.0–61.0)   | 75.5 (61.7–86.2) |
| Rice water stools and vomiting and dry mucous membranes                   | 15.4 (1.9–45.4)        | 83.8 (68.0–93.8)       | 25.0 (3.2–65.1)   | 73.8 (58.0–86.1) |

CI = confidence interval; NPV = negative predictive value; PPV = positive predictive value.

SUPPLEMENTAL TABLE 2  
Sensitivity, specificity, PPV, and NPV for tested cases aged more than 5 years in DRC

| Case definition                                                           | Sensitivity % (95% CI) | Specificity % (95% CI) | PPV % (95% CI)   | NPV % (95% CI)   |
|---------------------------------------------------------------------------|------------------------|------------------------|------------------|------------------|
| World Health Organization epidemic cholera definition                     | 92.6 (90.5–94.3)       | 5.9 (4.8–7.2)          | 34.0 (32.0–36.0) | 60.3 (52.0–68.1) |
| Watery stool and dehydration                                              | 95.9 (94.2–97.2)       | 6.1 (5.0–7.5)          | 34.3 (32.3–36.3) | 74.6 (65.9–82.0) |
| Watery stool and vomiting                                                 | 90.2 (87.9–92.2)       | 14.8 (13.0–16.7)       | 34.9 (32.8–37.0) | 74.8 (69.5–79.7) |
| Watery stool and ≤ 9 stools in the last 24 hours                          | 43.9 (40.3–47.6)       | 57.8 (55.2–60.3)       | 34.6 (31.6–37.8) | 66.9 (64.2–69.5) |
| Watery stool and (10–25) stools in the last 24 hours                      | 53.8 (50.1–57.4)       | 45.2 (42.6–47.8)       | 33.4 (30.7–36.1) | 65.7 (62.7–68.7) |
| Watery stool and dry mucous membranes                                     | 78.8 (75.6–81.7)       | 22.4 (20.2–24.6)       | 34.3 (32.0–36.6) | 67.2 (62.8–71.4) |
| Watery stool and dehydration and vomiting                                 | 88.8 (86.4–91.0)       | 15.8 (14.0–17.8)       | 35.0 (32.9–37.2) | 73.5 (68.3–78.3) |
| Watery stool and dehydration and ≤ 9 stools in the last 24 hours          | 47.9 (44.0–51.8)       | 52.9 (50.0–55.8)       | 35.6 (32.4–38.9) | 65.2 (62.1–68.2) |
| Watery stool and dehydration and (10–25) stools in the last 24 hours      | 48.3 (44.8–51.8)       | 52.1 (49.7–54.6)       | 33.3 (30.6–36.1) | 67.1 (64.5–69.7) |
| Watery stool and (dehydration or vomiting)                                | 97.7 (96.4–98.7)       | 4.0 (3.1–5.1)          | 34.2 (32.2–36.3) | 77.6 (66.6–86.4) |
| Watery stool and (dehydration or rice water stools)                       | 97.2 (95.8–98.3)       | 4.2 (3.2–5.4)          | 34.2 (32.2–36.3) | 74.7 (64.0–83.6) |
| Watery stool and (dehydration or rice water stools or vomiting)           | 97.9 (96.6–98.8)       | 3.5 (2.6–4.6)          | 34.2 (32.2–36.3) | 76.1 (64.1–85.7) |
| Watery stool and vomiting and dry mucous membranes                        | 74.5 (71.1–77.6)       | 29.9 (27.5–32.3)       | 35.3 (32.9–37.7) | 69.5 (65.9–73.1) |
| Rice water stools                                                         | 80.6 (77.7–83.3)       | 17.6 (15.7–19.6)       | 33.9 (31.8–36.1) | 63.4 (58.6–68.0) |
| Rice water stools and dehydration                                         | 83.8 (81.0–86.4)       | 17.2 (15.3–19.2)       | 34.1 (32.0–36.4) | 67.5 (62.5–72.2) |
| Rice water stools and vomiting                                            | 79.2 (76.1–82.0)       | 25.1 (22.9–27.3)       | 35.0 (32.7–37.3) | 70.3 (66.2–74.1) |
| Rice water stools and ≤ 9 stools in the last 24 hours                     | 36.4 (33.0–40.0)       | 65.0 (62.5–67.5)       | 34.8 (31.4–38.3) | 66.7 (64.1–69.1) |
| Rice water stools and (10–25) stools in the last 24 hours                 | 48.8 (45.1–52.5)       | 49.6 (47.0–52.2)       | 33.1 (30.3–36.0) | 65.4 (62.5–68.2) |
| Rice water stools and dry mucous membranes                                | 69.9 (66.4–73.2)       | 30.1 (27.7–32.6)       | 34.0 (31.6–36.6) | 66.0 (62.2–69.6) |
| Rice water stools and dehydration and vomiting                            | 78.3 (75.2–81.2)       | 25.5 (23.3–27.8)       | 35.1 (32.8–37.4) | 69.6 (65.5–73.5) |
| Rice water stools and dehydration and ≤ 9 stools in the last 24 hours     | 40.9 (37.1–44.9)       | 69.5 (56.6–62.3)       | 35.5 (32.0–39.1) | 64.9 (61.9–67.8) |
| Rice water stools and dehydration and (10–25) stools in the last 24 hours | 43.0 (39.6–46.5)       | 56.7 (54.3–59.1)       | 33.0 (30.2–35.9) | 66.7 (64.2–69.2) |
| Rice water stools and vomiting and dry mucous membranes                   | 66.6 (63.0–70.0)       | 36.7 (34.2–39.3)       | 35.1 (32.7–37.8) | 68.0 (64.5–71.3) |

CI = confidence interval; DRC = Democratic Republic of Congo; NPV = negative predictive value; PPV = positive predictive value.

SUPPLEMENTAL TABLE 3  
Sensitivity, specificity, PPV, and NPV for tested cases aged between 1 and 4 years in DRC

| Case definition                                                           | Sensitivity % (95% CI) | Specificity % (95% CI) | PPV % (95% CI)   | NPV % (95% CI)   |
|---------------------------------------------------------------------------|------------------------|------------------------|------------------|------------------|
| World Health Organization epidemic cholera definition                     | 94.6 (91.6–96.8)       | 5.0 (3.3–7.3)          | 39.2 (35.8–42.7) | 59.1 (43.2–73.7) |
| Watery stool and dehydration                                              | 95.9 (93.2–97.8)       | 5.1 (3.4–7.5)          | 39.1 (35.7–42.6) | 66.7 (49.8–80.9) |
| Watery stool and vomiting                                                 | 88.2 (84.2–91.5)       | 15.3 (12.3–18.8)       | 39.7 (36.1–43.4) | 67.2 (57.9–75.7) |
| Watery stool and ≤ 9 stools in the last 24 hours                          | 48.0 (42.4–53.6)       | 53.5 (49.0–58.0)       | 39.8 (34.9–44.9) | 61.6 (56.8–66.2) |
| Watery stool and (10–25) stools in the last 24 hours                      | 50.5 (44.8–56.1)       | 38.8 (34.1–43.7)       | 39.3 (34.5–44.2) | 50.0 (44.4–55.6) |
| Watery stool and dry mucous membranes                                     | 65.0 (59.4–70.3)       | 50.4 (45.9–54.9)       | 45.5 (40.8–50.3) | 69.3 (64.2–74.1) |
| Watery stool and dehydration and vomiting                                 | 86.5 (83.0–90.6)       | 15.6 (12.5–19.0)       | 39.5 (35.8–43.2) | 64.5 (55.2–73.0) |
| Watery stool and dehydration and ≤ 9 stools in the last 24 hours          | 48.2 (42.4–54.0)       | 52.1 (47.5–56.7)       | 39.5 (34.4–44.6) | 60.8 (55.9–65.7) |
| Watery stool and dehydration and (10–25) stools in the last 24 hours      | 48.3 (42.8–53.9)       | 52.0 (47.5–56.4)       | 39.3 (34.5–44.2) | 61.0 (56.3–65.6) |
| Watery stool and (dehydration or vomiting)                                | 98.1 (96.0–99.3)       | 4.4 (2.8–6.6)          | 39.6 (36.2–43.1) | 78.6 (59.0–91.7) |
| Watery stool and (dehydration or rice water stools)                       | 97.8 (95.5–99.1)       | 4.4 (2.8–6.6)          | 39.4 (36.0–42.9) | 75.9 (56.5–89.7) |
| Watery stool and (dehydration or rice water stools or vomiting)           | 98.4 (95.4–99.5)       | 4.2 (2.6–6.4)          | 39.6 (36.1–43.1) | 80.8 (60.6–93.4) |
| Watery stool and vomiting and dry mucous membranes                        | 58.7 (53.0–64.2)       | 55.6 (51.0–60.0)       | 45.7 (40.8–50.8) | 67.8 (63.0–72.4) |
| Rice water stools                                                         | 83.1 (78.7–87.0)       | 12.6 (9.9–15.8)        | 38.0 (34.5–41.7) | 53.7 (44.4–62.8) |
| Rice water stools and dehydration                                         | 84.9 (80.1–88.4)       | 12.7 (9.9–16.0)        | 38.0 (34.4–41.7) | 56.6 (47.0–65.9) |
| Rice water stools and vomiting                                            | 76.9 (71.9–81.4)       | 20.7 (17.2–24.5)       | 37.9 (34.2–41.8) | 58.7 (51.1–66.0) |
| Rice water stools and ≤ 9 stools in the last 24 hours                     | 39.4 (34.0–45.0)       | 58.1 (53.6–62.4)       | 37.5 (32.3–42.9) | 60.0 (55.5–64.4) |
| Rice water stools and (10–25) stools in the last 24 hours                 | 47.3 (41.7–53.0)       | 53.2 (48.7–57.7)       | 39.3 (34.3–44.4) | 61.3 (56.5–65.9) |
| Rice water stools and dry mucous membranes                                | 56.5 (50.7–62.0)       | 52.6 (48.0–57.1)       | 43.1 (38.2–48.1) | 65.5 (60.5–70.2) |
| Rice water stools and dehydration and vomiting                            | 75.7 (70.6–80.3)       | 21.0 (17.5–24.8)       | 37.8 (34.0–41.7) | 57.7 (50.2–65.0) |
| Rice water stools and dehydration and ≤ 9 stools in the last 24 hours     | 42.0 (36.2–47.9)       | 56.3 (51.6–60.9)       | 37.3 (32.0–42.8) | 61.0 (56.2–65.7) |
| Rice water stools and dehydration and (10–25) stools in the last 24 hours | 43.3 (38.0–48.7)       | 55.6 (51.2–60.0)       | 39.3 (34.3–44.4) | 59.7 (55.1–64.1) |
| Rice water stools and vomiting and dry mucous membranes                   | 50.8 (45.1–56.5)       | 57.5 (53.0–62.0)       | 43.3 (38.1–48.5) | 64.7 (60.0–69.2) |

CI = confidence interval; DRC = Democratic Republic of Congo; NPV = negative predictive value; PPV = positive predictive value.

SUPPLEMENTAL TABLE 4  
Sensitivity, specificity, PPV, and NPV for tested cases aged more than 5 years in Guinea

| Case definition                                                           | Sensitivity % (95% CI) | Specificity % (95% CI) | PPV % (95% CI)   | NPV % (95% CI)   |
|---------------------------------------------------------------------------|------------------------|------------------------|------------------|------------------|
| World Health Organization epidemic cholera definition                     | 98.9 (93.6–100.0)      | 7.8 (4.1–13.2)         | 37.2 (30.9–43.8) | 92.3 (64.0–99.8) |
| Watery stool and dehydration                                              | 86.9 (77.8–93.3)       | 23.0 (16.5–30.6)       | 39.0 (32.0–46.4) | 75.6 (60.5–87.1) |
| Watery stool and vomiting                                                 | 91.7 (83.6–96.6)       | 15.8 (10.3–22.7)       | 38.5 (31.7–45.6) | 76.7 (57.7–90.1) |
| Watery stool and ≤ 9 stools in the last 24 hours                          | 87.5 (78.2–93.8)       | 19.4 (13.0–27.3)       | 40.2 (32.9–47.9) | 71.4 (53.7–85.4) |
| Watery stool and (10–25) stools in the last 24 hours                      | 11.3 (5.3–20.3)        | 84.5 (77.1–90.3)       | 31.0 (15.3–50.8) | 60.6 (53.0–67.7) |
| Watery stool and dry mucous membranes                                     | 58.6 (46.2–70.2)       | 28.6 (21.1–37.0)       | 30.1 (22.6–38.6) | 56.7 (44.0–68.8) |
| Watery stool and dehydration and vomiting                                 | 80.7 (70.6–88.6)       | 28.5 (21.3–36.6)       | 39.4 (32.0–47.2) | 71.9 (58.5–83.0) |
| Watery stool and dehydration and ≤ 9 stools in the last 24 hours          | 46.2 (37.5–55.1)       | 57.4 (50.0–64.5)       | 43.0 (34.7–51.5) | 60.6 (53.0–67.7) |
| Watery stool and dehydration and (10–25) stools in the last 24 hours      | 32.1 (15.9–52.4)       | 71.2 (58.7–81.7)       | 32.1 (15.9–52.4) | 71.2 (58.7–81.7) |
| Watery stool and (dehydration or vomiting)                                | 97.6 (91.6–99.7)       | 10.4 (5.9–16.9)        | 38.6 (32.0–45.5) | 88.2 (63.6–98.5) |
| Watery stool and (dehydration or rice water stools)                       | 98.8 (93.5–100.0)      | 15.8 (10.3–22.7)       | 40.3 (33.5–47.3) | 95.8 (78.9–99.9) |
| Watery stool and (dehydration or rice water stools or vomiting)           | 98.8 (93.5–100.0)      | 8.5 (4.4–14.3)         | 38.7 (32.1–45.6) | 92.3 (64.0–99.8) |
| Watery stool and vomiting and dry mucous membranes                        | 57.1 (44.7–68.9)       | 34.4 (26.3–43.1)       | 31.7 (23.7–40.6) | 60.0 (48.0–71.1) |
| Rice water stools                                                         | 91.8 (83.8–96.6)       | 49.3 (41.1–57.6)       | 50.3 (42.2–58.4) | 91.5 (83.2–96.5) |
| Rice water stools and dehydration                                         | 79.8 (69.6–87.7)       | 55.5 (47.0–63.7)       | 50.8 (41.9–59.6) | 82.7 (73.7–89.6) |
| Rice water stools and vomiting                                            | 84.5 (75.0–91.5)       | 54.2 (45.7–62.5)       | 51.8 (43.1–60.4) | 85.7 (76.8–92.2) |
| Rice water stools and ≤ 9 stools in the last 24 hours                     | 80.0 (69.6–88.1)       | 55.1 (46.0–63.9)       | 52.9 (43.6–62.0) | 81.4 (71.6–89.0) |
| Rice water stools and (10–25) stools in the last 24 hours                 | 11.3 (5.3–20.3)        | 89.0 (82.2–93.8)       | 39.1 (19.7–61.5) | 61.4 (54.0–68.5) |
| Rice water stools and dry mucous membranes                                | 51.4 (39.2–63.6)       | 61.8 (52.8–70.2)       | 41.9 (31.3–53.0) | 70.4 (31.3–53.0) |
| Rice water stools and dehydration and vomiting                            | 73.5 (62.7–82.6)       | 59.2 (50.6–67.3)       | 51.3 (41.9–60.5) | 79.2 (70.3–86.5) |
| Rice water stools and dehydration and ≤ 9 stools in the last 24 hours     | 43.7 (34.8–52.8)       | 71.3 (63.6–78.3)       | 55.0 (44.7–65.0) | 61.2 (53.7–68.3) |
| Rice water stools and dehydration and (10–25) stools in the last 24 hours | 26.5 (12.9–44.4)       | 85.3 (76.5–91.7)       | 39.1 (19.7–61.5) | 76.4 (67.2–84.1) |
| Rice water stools and vomiting and dry mucous membranes                   | 50.0 (37.8–62.2)       | 65.9 (57.0–74.0)       | 44.3 (33.1–55.9) | 70.8 (61.8–78.8) |

CI = confidence interval; NPV = negative predictive value; PPV = positive predictive value.

SUPPLEMENTAL TABLE 5  
Sensitivity, specificity, PPV, and NPV for tested cases aged more than 5 years in Mozambique

| Case definition                                                           | Sensitivity % (95% CI) | Specificity % (95% CI) | PPV % (95% CI)   | NPV % (95% CI)   |
|---------------------------------------------------------------------------|------------------------|------------------------|------------------|------------------|
| World Health Organization epidemic cholera definition                     | 64.5 (52.7–75.1)       | 15.6 (11.0–21.1)       | 21.0 (16.0–26.8) | 55.7 (42.4–68.5) |
| Watery stool and dehydration                                              | 66.0 (51.2–78.8)       | 38.1 (31.9–45.8)       | 21.3 (15.1–28.6) | 81.9 (72.6–89.1) |
| Watery stool and vomiting                                                 | 45.5 (30.4–61.2)       | 46.7 (39.6–53.9)       | 16.0 (10.1–23.6) | 79.3 (70.8–86.3) |
| Watery stool and ≤ 9 stools in the last 24 hours                          | 86.7 (69.3–96.2)       | 17.2 (12.0–23.5)       | 14.9 (9.9–21.0)  | 88.6 (73.3–96.8) |
| Watery stool and (10–25) stools in the last 24 hours                      | 10.0 (2.1–26.5)        | 91.7 (86.6–95.3)       | 16.7 (3.6–41.4)  | 85.9 (80.2–90.5) |
| Watery stool and dry mucous membranes                                     | 11.4 (3.2–26.7)        | 68.4 (61.0–75.1)       | 6.7 (1.8–16.2)   | 79.6 (72.3–85.7) |
| Watery stool and dehydration and vomiting                                 | 38.6 (24.4–54.5)       | 52.3 (45.0–59.6)       | 15.6 (9.4–23.8)  | 78.9 (70.8–85.6) |
| Watery stool and dehydration and ≤ 9 stools in the last 24 hours          | 42.6 (28.3–57.8)       | 63.3 (57.1–69.2)       | 17.5 (11.1–25.8) | 85.7 (79.9–90.4) |
| Watery stool and dehydration and (10–25) stools in the last 24 hours      | 23.1 (5.0–53.8)        | 85.4 (76.7–91.8)       | 17.6 (3.8–43.4)  | 89.1 (80.9–94.7) |
| Watery stool and (dehydration or vomiting)                                | 77.3 (62.2–88.5)       | 31.6 (25.1–38.7)       | 20.5 (14.6–27.4) | 85.9 (75.6–93.0) |
| Watery stool and (dehydration or rice water stools)                       | 73.8 (58.0–86.1)       | 36.8 (30.0–44.1)       | 20.5 (14.4–27.9) | 86.4 (77.0–93.0) |
| Watery stool and (dehydration or rice water stools or vomiting)           | 77.5 (61.5–89.2)       | 30.1 (23.6–37.2)       | 19.3 (13.5–26.2) | 86.2 (75.3–93.5) |
| Watery stool and vomiting and dry mucous membranes                        | 11.4 (3.2–26.7)        | 69.9 (62.5–76.6)       | 7.0 (1.9–17.0)   | 79.9 (72.7–85.9) |
| Rice water stools                                                         | 27.8 (17.9–39.6)       | 84.2 (78.6–88.8)       | 37.0 (24.3–51.3) | 77.7 (71.8–82.9) |
| Rice water stools and dehydration                                         | 21.4 (10.3–36.8)       | 85.2 (79.4–89.9)       | 23.7 (11.4–40.2) | 83.5 (77.6–88.4) |
| Rice water stools and vomiting                                            | 20.0 (9.1–35.6)        | 88.7 (83.4–92.8)       | 26.7 (12.3–45.9) | 84.4 (78.7–89.1) |
| Rice water stools and ≤ 9 stools in the last 24 hours                     | 38.5 (20.2–59.4)       | 88.1 (82.3–92.5)       | 32.3 (16.7–51.4) | 90.6 (85.3–94.6) |
| Rice water stools and (10–25) stools in the last 24 hours                 | 0.0 (0.0–13.2)         | 94.9 (90.5–97.6)       | 0.0 (0.0–33.6)   | 86.5 (80.9–91.0) |
| Rice water stools and dry mucous membranes                                | 8.8 (1.9–23.7)         | 93.2 (88.5–96.4)       | 20.0 (4.3–48.1)  | 84.2 (78.3–89.0) |
| Rice water stools and dehydration and vomiting                            | 17.5 (7.3–32.8)        | 88.5 (83.2–92.7)       | 24.1 (10.3–43.5) | 83.7 (77.9–88.5) |
| Rice water stools and dehydration and ≤ 9 stools in the last 24 hours     | 23.5 (10.7–41.2)       | 90.1 (84.8–94.0)       | 30.8 (14.3–51.8) | 86.3 (80.6–90.9) |
| Rice water stools and dehydration and (10–25) stools in the last 24 hours | 0.0 (0.0–18.5)         | 95.1 (90.5–97.8)       | 0.0 (0.0–36.9)   | 89.5 (84.0–93.7) |
| Rice water stools and vomiting and dry mucous membranes                   | 8.8 (1.9–23.7)         | 94.3 (89.8–97.2)       | 23.1 (5.0–53.8)  | 84.3 (78.4–89.1) |

CI = confidence interval; NPV = negative predictive value; PPV = positive predictive value.

SUPPLEMENTAL TABLE 6  
Sensitivity, specificity, PPV, and NPV for tested cases aged between 1 and 4 years in Mozambique

| Case definition                                                           | Sensitivity % (95% CI) | Specificity % (95% CI) | PPV % (95% CI)  | NPV % (95% CI)     |
|---------------------------------------------------------------------------|------------------------|------------------------|-----------------|--------------------|
| World Health Organization epidemic cholera definition                     | 66.7 (9.4–99.2)        | 9.4 (3.7–14.7)         | 1.9 (0.2–6.7)   | 90.0 (55.5–99.7)   |
| Watery stool and dehydration                                              | 100.0 (15.8–100.0)     | 78.0 (69.0–85.4)       | 7.7 (0.9–25.1)  | 100.0 (95.8–100.0) |
| Watery stool and vomiting                                                 | 50.0 (1.3–98.7)        | 57.1 (47.1–66.8)       | 2.2 (0.1–11.5)  | 98.4 (91.2–100.0)  |
| Watery stool and ≤ 9 stools in the last 24 hours                          | 0.0 (0.0–97.5)         | 10.7 (5.5–18.3)        | 0.0 (0.0–3.9)   | 91.7 (61.5–99.8)   |
| Watery stool and (10–25) stools in the last 24 hours                      | 100.0 (2.5–100.0)      | 95.1 (89.0–98.4)       | 16.7 (0.4–64.1) | 100.0 (96.3–100.0) |
| Watery stool and dry mucous membranes                                     | 0.0 (0.0–84.2)         | 92.1 (85.0–96.5)       | 0.0 (0.0–36.9)  | 97.9 (92.6–99.7)   |
| Watery stool and dehydration and vomiting                                 | 50.0 (1.3–98.7)        | 85.6 (77.6–91.7)       | 6.3 (0.2–30.2)  | 98.9 (94.0–100.0)  |
| Watery stool and dehydration and ≤ 9 stools in the last 24 hours          | NA                     | NA                     | NA              | NA                 |
| Watery stool and dehydration and (10–25) stools in the last 24 hours      | 50.0 (1.3–98.7)        | 95.5 (88.8–98.7)       | 20.0 (0.5–71.6) | 98.8 (93.6–100.0)  |
| Watery stool and (dehydration or vomiting)                                | 100.0 (15.8–100.0)     | 51.0 (41.0–60.9)       | 3.8 (0.5–13.0)  | 100.0 (93.3–100.0) |
| Watery stool and (dehydration or rice water stools)                       | 100.0 (15.8–100.0)     | 81.7 (72.9–88.6)       | 9.5 (1.2–30.4)  | 100.0 (95.8–100.0) |
| Watery stool and (dehydration or rice water stools or vomiting)           | 100.0 (15.8–100.0)     | 53.5 (43.2–63.6)       | 4.2 (0.5–14.3)  | 100.0 (93.3–100.0) |
| Watery stool and vomiting and dry mucous membranes                        | 0.0 (0.0–84.2)         | 92.9 (85.8–97.1)       | 0.0 (0.0–41.0)  | 97.8 (92.4–99.7)   |
| Rice water stools                                                         | 0.0 (0.0–70.8)         | 98.1 (93.5–99.8)       | 0.0 (0.0–84.2)  | 97.2 (92.2–99.4)   |
| Rice water stools and dehydration                                         | 0.0 (0.0–84.2)         | 98.1 (93.3–99.8)       | 0.0 (0.0–84.2)  | 98.1 (93.2–99.8)   |
| Rice water stools and vomiting                                            | 0.0 (0.0–84.2)         | 98.0 (93.0–99.8)       | 0.0 (0.0–84.2)  | 98.0 (93.0–99.8)   |
| Rice water stools and ≤ 9 stools in the last 24 hours                     | 0.0 (0.0–97.5)         | 99.0 (94.6–100.0)      | 0.0 (0.0–97.5)  | 99.0 (94.6–100.0)  |
| Rice water stools and (10–25) stools in the last 24 hours                 | 0.0 (0.0–97.5)         | 99.0 (94.6–100.0)      | 0.0 (0.0–97.5)  | 99.0 (94.6–100.0)  |
| Rice water stools and dry mucous membranes                                | NA                     | NA                     | NA              | NA                 |
| Rice water stools and dehydration and vomiting                            | 0.0 (0.0–84.2)         | 98.0 (93.0–99.8)       | 0.0 (0.0–84.2)  | 98.0 (93.0–99.8)   |
| Rice water stools and dehydration and ≤ 9 stools in the last 24 hours     | 0.0 (0.0–97.5)         | 99.0 (94.5–100.0)      | 0.0 (0.0–97.5)  | 99.0 (94.5–100.0)  |
| Rice water stools and dehydration and (10–25) stools in the last 24 hours | 0.0 (0.0–97.5)         | 99.0 (94.5–100.0)      | 0.0 (0.0–97.5)  | 99.0 (94.5–100.0)  |
| Rice water stools and vomiting and dry mucous membranes                   | NA                     | NA                     | NA              | NA                 |

CI = confidence interval; NA = not applicable; NPV = negative predictive value; PPV = positive predictive value.

SUPPLEMENTAL TABLE 7  
Sensitivity, specificity, PPV, and NPV for tested cases aged more than 5 years in Tanzania

| Case definition                                                           | Sensitivity % (95% CI) | Specificity % (95% CI) | PPV % (95% CI)     | NPV % (95% CI)   |
|---------------------------------------------------------------------------|------------------------|------------------------|--------------------|------------------|
| World Health Organization epidemic cholera definition                     | 91.9 (78.1–98.3)       | 18.2 (5.2–40.3)        | 65.4 (50.9–78.0)   | 57.1 (18.4–90.1) |
| Watery stool and dehydration                                              | 97.1 (84.7–99.9)       | 25.0 (8.7–49.1)        | 68.8 (53.7–81.3)   | 83.3 (35.9–99.6) |
| Watery stool and vomiting                                                 | 91.9 (78.1–98.3)       | 25.0 (8.7–49.1)        | 69.4 (54.6–81.7)   | 62.5 (24.5–91.5) |
| Watery stool and ≤ 9 stools in the last 24 hours                          | 47.1 (29.8–64.9)       | 31.6 (12.6–56.6)       | 55.2 (35.7–73.9)   | 25.0 (9.8–46.7)  |
| Watery stool and (10–25) stools in the last 24 hours                      | 50.0 (32.4–67.6)       | 84.2 (60.4–96.6)       | 85.0 (62.1–96.8)   | 48.5 (30.8–66.5) |
| Watery stool and dry mucous membranes                                     | 33.3 (4.3–77.7)        | 83.3 (35.9–99.6)       | 66.7 (9.4–99.2)    | 55.6 (21.2–86.3) |
| Watery stool and dehydration and vomiting                                 | 97.0 (84.2–99.9)       | 21.1 (6.1–45.6)        | 68.8 (53.7–81.3)   | 80.0 (28.4–99.5) |
| Watery stool and dehydration and ≤ 9 stools in the last 24 hours          | 50.0 (31.3–68.7)       | 57.7 (36.9–76.6)       | 57.7 (36.9–76.6)   | 50.0 (31.3–68.7) |
| Watery stool and dehydration and (10–25) stools in the last 24 hours      | 50.0 (32.4–67.6)       | 70.0 (34.8–93.3)       | 85.0 (62.1–96.8)   | 29.2 (12.6–51.1) |
| Watery stool and (dehydration or vomiting)                                | 97.1 (84.7–99.9)       | 21.1 (6.1–45.6)        | 68.8 (53.7–81.3)   | 80.0 (28.4–99.5) |
| Watery stool and (dehydration or rice water stools)                       | 97.1 (84.7–99.9)       | 25.0 (8.7–49.1)        | 68.8 (53.7–81.3)   | 83.3 (35.9–99.6) |
| Watery stool and (dehydration or rice water stools or vomiting)           | 97.1 (84.7–99.9)       | 21.1 (6.1–45.6)        | 68.8 (53.7–81.3)   | 80.0 (28.4–99.5) |
| Watery stool and vomiting and dry mucous membranes                        | NA                     | NA                     | NA                 | NA               |
| Rice water stools                                                         | 83.8 (72.5–96.7)       | 81.8 (50.1–93.2)       | 88.6 (72.5–96.7)   | 75.0 (50.1–93.2) |
| Rice water stools and dehydration                                         | 88.2 (72.5–96.7)       | 80.0 (56.3–94.3)       | 88.2 (72.5–96.7)   | 80.0 (56.3–94.3) |
| Rice water stools and vomiting                                            | 83.8 (68.0–93.8)       | 80.0 (56.3–94.3)       | 88.6 (73.3–96.8)   | 72.7 (49.8–89.3) |
| Rice water stools and ≤ 9 stools in the last 24 hours                     | 38.2 (22.2–56.4)       | 94.7 (74.0–99.9)       | 92.9 (66.1–99.8)   | 46.2 (30.1–62.8) |
| Rice water stools and (10–25) stools in the last 24 hours                 | 50.0 (32.4–67.6)       | 89.5 (66.9–98.7)       | 89.5 (66.9–98.7)   | 50.0 (32.4–67.6) |
| Rice water stools and dry mucous membranes                                | 33.3 (4.3–77.7)        | 100.0 (54.1–100.0)     | 100.0 (15.8–100.0) | 50.0 (26.2–87.8) |
| Rice water stools and dehydration and vomiting                            | 88.2 (72.5–96.7)       | 78.9 (54.4–93.9)       | 88.2 (72.5–96.7)   | 78.9 (54.4–93.9) |
| Rice water stools and dehydration and ≤ 9 stools in the last 24 hours     | 44.4 (25.5–64.7)       | 94.1 (71.3–99.9)       | 92.3 (64.0–99.8)   | 51.6 (33.1–69.8) |
| Rice water stools and dehydration and (10–25) stools in the last 24 hours | 45.9 (29.5–63.1)       | 89.5 (66.9–98.7)       | 89.5 (66.9–98.7)   | 45.9 (29.5–63.1) |
| Rice water stools and vomiting and dry mucous membranes                   | NA                     | NA                     | NA                 | NA               |

CI = confidence interval; NA = not applicable; NPV = negative predictive value; PPV = positive predictive value.

SUPPLEMENTAL TABLE 8  
Sensitivity, specificity, PPV, and NPV for tested cases aged more than 5 years in Togo

| Case definition                                                           | Sensitivity % (95% CI) | Specificity % (95% CI) | PPV % (95% CI)   | NPV % (95% CI)   |
|---------------------------------------------------------------------------|------------------------|------------------------|------------------|------------------|
| World Health Organization epidemic cholera definition                     | 98.9 (96.8–99.8)       | 6.4 (3.7–10.2)         | 53.6 (49.1–58.0) | 84.2 (60.4–96.6) |
| Watery stool and dehydration                                              | 88.1 (83.7–91.8)       | 63.5 (57.1–69.6)       | 72.8 (67.6–77.5) | 82.9 (76.7–88.0) |
| Watery stool and vomiting                                                 | 91.5 (87.2–94.3)       | 40.8 (34.6–47.3)       | 63.1 (58.1–67.9) | 80.6 (72.6–87.2) |
| Watery stool and ≤ 9 stools in the last 24 hours                          | 59.7 (53.4–65.8)       | 20.4 (15.3–26.2)       | 45.6 (40.2–51.2) | 31.1 (23.7–39.2) |
| Watery stool and (10–25) stools in the last 24 hours                      | 39.9 (33.8–46.2)       | 82.7 (77.2–87.4)       | 72.1 (63.9–79.4) | 55.2 (49.7–60.5) |
| Watery stool and dry mucous membranes                                     | 68.5 (62.4–74.3)       | 76.8 (70.7–82.1)       | 76.2 (70.1–81.7) | 69.2 (63.1–74.8) |
| Watery stool and dehydration and vomiting                                 | 82.5 (77.5–86.9)       | 69.5 (63.3–75.3)       | 75.0 (69.7–79.8) | 78.2 (72.1–83.6) |
| Watery stool and dehydration and ≤ 9 stools in the last 24 hours          | 45.1 (38.2–51.2)       | 76.8 (71.2–81.8)       | 67.6 (60.3–74.3) | 56.7 (51.3–61.9) |
| Watery stool and dehydration and (10–25) stools in the last 24 hours      | 43.9 (37.3–50.7)       | 86.8 (81.1–91.3)       | 79.7 (71.5–86.4) | 56.7 (50.8–62.5) |
| Watery stool and (dehydration or vomiting)                                | 97.4 (94.7–98.9)       | 34.6 (28.6–40.9)       | 62.2 (57.4–66.9) | 92.3 (84.8–96.9) |
| Watery stool and (dehydration or rice water stools)                       | 95.5 (92.3–97.7)       | 59.7 (53.1–66.0)       | 72.7 (67.8–77.3) | 92.2 (86.8–95.9) |
| Watery stool and (dehydration or rice water stools or vomiting)           | 98.1 (95.7–99.4)       | 35.0 (29.0–41.5)       | 63.1 (58.2–67.7) | 94.3 (87.2–98.1) |
| Watery stool and vomiting and dry mucous membranes                        | 65.7 (59.5–71.6)       | 78.9 (73.1–84.1)       | 77.3 (71.0–82.7) | 67.9 (61.9–73.5) |
| Rice water stools                                                         | 70.2 (64.4–75.6)       | 82.0 (76.6–86.6)       | 81.3 (75.7–86.1) | 71.2 (65.5–76.4) |
| Rice water stools and dehydration                                         | 63.8 (57.7–69.6)       | 86.1 (81.1–90.3)       | 83.8 (78.0–88.6) | 67.9 (62.3–73.1) |
| Rice water stools and vomiting                                            | 65.1 (59.1–70.7)       | 84.7 (79.5–89.1)       | 83.1 (77.4–87.9) | 67.8 (62.1–73.1) |
| Rice water stools and ≤ 9 stools in the last 24 hours                     | 43.3 (37.1–49.6)       | 85.5 (80.1–89.8)       | 77.3 (69.5–83.9) | 56.8 (51.3–62.2) |
| Rice water stools and (10–25) stools in the last 24 hours                 | 27.0 (21.6–32.9)       | 95.5 (91.8–97.8)       | 87.2 (77.7–93.7) | 53.3 (48.2–58.3) |
| Rice water stools and dry mucous membranes                                | 47.4 (41.0–53.8)       | 90.2 (85.5–93.7)       | 84.2 (77.0–89.8) | 60.8 (55.4–66.1) |
| Rice water stools and dehydration and vomiting                            | 59.3 (53.2–65.2)       | 87.3 (82.4–91.3)       | 84.1 (78.1–89.0) | 65.5 (60.0–70.7) |
| Rice water stools and dehydration and ≤ 9 stools in the last 24 hours     | 33.5 (27.9–39.4)       | 89.7 (85.1–93.3)       | 79.3 (70.8–86.3) | 53.4 (48.4–58.5) |
| Rice water stools and dehydration and (10–25) stools in the last 24 hours | 29.6 (23.7–36.1)       | 96.0 (92.3–98.3)       | 89.2 (79.8–95.2) | 55.3 (49.9–60.6) |
| Rice water stools and vomiting and dry mucous membranes                   | 45.3 (39.0–51.8)       | 91.1 (86.5–94.5)       | 84.8 (77.6–90.5) | 60.2 (54.7–65.4) |

CI = confidence interval; NPV = negative predictive value; PPV = positive predictive value.

SUPPLEMENTAL TABLE 9  
Sensitivity, specificity, PPV, and NPV for tested cases aged between 1 and 4 years in Togo

| Case definition                                                           | Sensitivity % (95% CI) | Specificity % (95% CI) | PPV % (95% CI)     | NPV % (95% CI)     |
|---------------------------------------------------------------------------|------------------------|------------------------|--------------------|--------------------|
| World Health Organization epidemic cholera definition                     | 100.0 (81.5–100.0)     | 10.3 (2.2–27.3)        | 40.9 (26.3–56.8)   | 100.0 (29.2–100.0) |
| Watery stool and dehydration                                              | 88.9 (65.3–98.6)       | 71.4 (51.3–86.8)       | 66.7 (44.7–84.4)   | 90.9 (70.8–98.9)   |
| Watery stool and vomiting                                                 | 94.4 (72.7–99.9)       | 48.0 (27.8–68.7)       | 56.7 (37.4–74.5)   | 92.3 (64.0–99.8)   |
| Watery stool and ≤ 9 stools in the last 24 hours                          | 76.5 (50.1–93.2)       | 12.0 (2.5–31.2)        | 37.1 (21.5–55.1)   | 42.9 (9.9–81.6)    |
| Watery stool and (10–25) stools in the last 24 hours                      | 23.5 (6.8–49.9)        | 96.0 (79.6–99.9)       | 80.0 (28.4–99.5)   | 64.9 (47.5–79.8)   |
| Watery stool and dry mucous membranes                                     | 37.5 (15.2–64.6)       | 84.6 (65.1–95.6)       | 60.0 (26.2–87.8)   | 68.8 (50.0–83.9)   |
| Watery stool and dehydration and vomiting                                 | 83.3 (58.6–96.4)       | 84.0 (63.9–95.5)       | 78.9 (54.4–93.9)   | 87.5 (67.6–97.3)   |
| Watery stool and dehydration and ≤ 9 stools in the last 24 hours          | 46.2 (26.6–66.6)       | 78.1 (60.0–90.7)       | 63.2 (38.4–83.7)   | 64.1 (47.2–78.8)   |
| Watery stool and dehydration and (10–25) stools in the last 24 hours      | 37.5 (8.5–75.5)        | 100.0 (81.5–100.0)     | 100.0 (29.2–100.0) | 78.3 (56.3–92.5)   |
| Watery stool and (dehydration or vomiting)                                | 100.0 (81.5–100.0)     | 36.0 (18.0–57.5)       | 52.9 (35.1–70.2)   | 100.0 (66.4–100.0) |
| Watery stool and (dehydration or rice water stools)                       | 100.0 (81.5–100.0)     | 70.4 (49.8–86.2)       | 69.2 (48.2–85.7)   | 100.0 (82.4–100.0) |
| Watery stool and (dehydration or rice water stools or vomiting)           | 100.0 (81.5–100.0)     | 32.0 (14.9–53.5)       | 51.4 (34.0–68.6)   | 100.0 (63.1–100.0) |
| Watery stool and vomiting and dry mucous membranes                        | 37.5 (15.2–64.6)       | 87.0 (66.4–97.2)       | 66.7 (29.9–92.5)   | 66.7 (47.2–82.7)   |
| Rice water stools                                                         | 72.2 (46.5–90.3)       | 89.3 (71.8–97.7)       | 81.3 (54.4–96.0)   | 83.3 (65.3–94.4)   |
| Rice water stools and dehydration                                         | 61.1 (35.7–82.7)       | 92.6 (75.7–99.1)       | 84.6 (54.6–98.1)   | 78.1 (60.0–90.7)   |
| Rice water stools and vomiting                                            | 66.7 (41.0–86.7)       | 96.0 (79.6–99.9)       | 92.3 (64.0–99.8)   | 80.0 (61.4–92.3)   |
| Rice water stools and ≤ 9 stools in the last 24 hours                     | 52.9 (27.8–77.0)       | 87.5 (67.6–97.3)       | 75.0 (42.8–94.5)   | 72.4 (52.8–87.3)   |
| Rice water stools and (10–25) stools in the last 24 hours                 | 17.6 (3.8–43.4)        | 100.0 (85.8–100.0)     | 100.0 (29.2–100.0) | 63.2 (46.0–78.2)   |
| Rice water stools and dry mucous membranes                                | 18.8 (4.0–45.6)        | 100.0 (86.3–100.0)     | 100.0 (29.2–100.0) | 65.8 (48.6–80.4)   |
| Rice water stools and dehydration and vomiting                            | 55.6 (30.8–78.5)       | 96.0 (79.6–99.9)       | 90.9 (58.7–99.8)   | 75.0 (56.6–88.5)   |
| Rice water stools and dehydration and ≤ 9 stools in the last 24 hours     | 34.8 (16.4–57.3)       | 92.3 (74.9–99.1)       | 80.0 (44.4–97.5)   | 61.5 (44.6–76.6)   |
| Rice water stools and dehydration and (10–25) stools in the last 24 hours | 18.2 (2.3–51.8)        | 100.0 (84.6–100.0)     | 100.0 (15.8–100.0) | 71.0 (52.0–85.8)   |
| Rice water stools and vomiting and dry mucous membranes                   | 27.3 (6.0–61.0)        | 100.0 (84.6–100.0)     | 100.0 (29.2–100.0) | 73.3 (54.1–87.7)   |

CI = confidence interval; NPV = negative predictive value; PPV = positive predictive value.

SUPPLEMENTAL TABLE 10  
Sensitivity, specificity, PPV and NPV for tested cases aged more than 5 years in Uganda

| Case definition                                                            | Sensitivity % (95% CI) | Specificity % (95% CI) | PPV % (95% CI)   | NPV % (95% CI)   |
|----------------------------------------------------------------------------|------------------------|------------------------|------------------|------------------|
| World Health Organization epidemic cholera definition                      | 97.1 (89.8–99.6)       | 17.6 (12.7–23.5)       | 27.6 (22.0–33.7) | 94.9 (83.7–99.4) |
| Watery stool and dehydration                                               | 91.3 (79.2–97.6)       | 8.9 (4.5–15.4)         | 27.3 (20.4–35.0) | 73.3 (44.9–92.2) |
| Watery stool and vomiting                                                  | 89.1 (76.4–96.4)       | 23.3 (16.4–31.4)       | 28.7 (21.4–36.8) | 86.1 (70.5–95.3) |
| Watery stool and $\leq 9$ stools in the last 24 hours                      | 33.3 (17.3–52.8)       | 42.2 (29.9–55.2)       | 21.3 (10.7–35.7) | 57.4 (42.2–71.7) |
| Watery stool and (10–25) stools in the last 24 hours                       | 66.7 (47.2–82.7)       | 64.1 (51.1–75.7)       | 46.5 (31.2–62.3) | 80.4 (66.9–90.2) |
| Watery stool and dry mucous membranes                                      | 66.7 (9.4–99.2)        | 41.0 (25.6–57.9)       | 8.0 (1.0–26.0)   | 94.1 (71.3–99.9) |
| Watery stool and dehydration and vomiting                                  | 83.8 (68.0–93.8)       | 20.0 (12.7–29.2)       | 27.9 (19.8–37.2) | 76.9 (56.4–91.0) |
| Watery stool and dehydration and $\leq 9$ stools in the last 24 hours      | 45.5 (16.7–76.6)       | 55.2 (41.5–68.3)       | 16.1 (5.5–33.7)  | 84.2 (68.7–94.0) |
| Watery stool and dehydration and (10–25) stools in the last 24 hours       | 48.4 (30.2–66.9)       | 57.1 (41.0–72.3)       | 45.5 (28.1–63.6) | 60.0 (43.3–75.1) |
| Watery stool and (dehydration or vomiting)                                 | 94.6 (81.8–99.3)       | 10.0 (4.9–17.6)        | 28.0 (20.3–36.7) | 83.3 (51.6–97.9) |
| Watery stool and (dehydration or rice water stools)                        | 97.6 (87.1–99.9)       | 8.3 (3.8–15.1)         | 28.6 (21.3–36.8) | 90.0 (55.5–99.7) |
| Watery stool and (dehydration or rice water stools or vomiting)            | 96.9 (83.8–99.9)       | 9.1 (4.0–17.1)         | 27.9 (19.8–37.2) | 88.9 (51.8–99.7) |
| Watery stool and vomiting and dry mucous membranes                         | 50.0 (1.3–98.7)        | 48.7 (32.4–65.2)       | 4.8 (0.1–23.8)   | 95.0 (75.1–99.9) |
| Rice water stools                                                          | 73.3 (60.3–83.9)       | 49.4 (41.8–57.1)       | 33.3 (25.4–42.1) | 84.3 (75.8–90.8) |
| Rice water stools and dehydration                                          | 71.4 (55.4–84.3)       | 40.7 (31.6–50.4)       | 30.9 (21.9–41.1) | 79.3 (66.6–88.8) |
| Rice water stools and vomiting                                             | 70.7 (54.5–83.9)       | 45.4 (35.8–55.2)       | 33.0 (23.3–43.8) | 80.3 (68.2–89.4) |
| Rice water stools and $\leq 9$ stools in the last 24 hours                 | 27.6 (12.7–47.2)       | 71.7 (58.6–82.5)       | 32.0 (14.9–53.5) | 67.2 (54.3–78.4) |
| Rice water stools and (10–25) stools in the last 24 hours                  | 51.7 (32.5–70.6)       | 70.0 (56.8–81.2)       | 45.5 (28.1–63.6) | 75.0 (61.6–85.6) |
| Rice water stools and dry mucous membranes                                 | 66.7 (9.4–99.2)        | 58.3 (40.8–74.5)       | 11.8 (1.5–36.4)  | 95.5 (77.2–99.9) |
| Rice water stools and dehydration and vomiting                             | 69.7 (51.3–84.4)       | 45.7 (35.2–56.4)       | 31.5 (21.1–43.4) | 80.8 (67.5–90.4) |
| Rice water stools and dehydration and $\leq 9$ stools in the last 24 hours | 35.7 (12.8–64.9)       | 72.7 (57.2–85.0)       | 29.4 (10.3–56.0) | 78.0 (62.4–89.4) |
| Rice water stools and dehydration and (10–25) stools in the last 24 hours  | 42.3 (23.4–63.1)       | 70.0 (55.4–82.1)       | 42.3 (23.4–63.1) | 70.0 (55.4–82.1) |
| Rice water stools and vomiting and dry mucous membranes                    | 50.0 (1.3–98.7)        | 61.1 (43.5–76.9)       | 6.7 (0.2–31.9)   | 95.7 (78.1–99.9) |

CI = confidence interval; NPV = negative predictive value; PPV = positive predictive value.

SUPPLEMENTAL TABLE 11  
Sensitivity, specificity, PPV, and NPV for tested cases aged between 1 and 4 years in Uganda

| Case definition                                                           | Sensitivity % (95% CI) | Specificity % (95% CI) | PPV % (95% CI)   | NPV % (95% CI)   |
|---------------------------------------------------------------------------|------------------------|------------------------|------------------|------------------|
| World Health Organization epidemic cholera definition                     | 92.9 (66.1–99.8)       | 13.0 (2.8–33.6)        | 39.4 (22.9–57.9) | 75.0 (19.4–99.4) |
| Watery stool and dehydration                                              | 90.9 (58.7–99.8)       | 0.0 (0.0–20.6)         | 38.5 (20.2–59.4) | 0.0 (0.0–97.5)   |
| Watery stool and vomiting                                                 | 91.7 (61.5–99.8)       | 12.5 (1.6–38.3)        | 44.0 (24.4–65.1) | 66.7 (9.4–99.2)  |
| Watery stool and ≤ 9 stools in the last 24 hours                          | 60.0 (26.2–87.8)       | 33.3 (4.3–77.7)        | 60.0 (26.2–87.8) | 33.3 (4.3–77.7)  |
| Watery stool and (10–25) stools in the last 24 hours                      | 30.0 (6.7–65.2)        | 66.7 (22.3–95.7)       | 60.0 (14.7–94.7) | 36.4 (10.9–69.2) |
| Watery stool and dry mucous membranes                                     | NA                     | NA                     | NA               | NA               |
| Watery stool and dehydration and vomiting                                 | 88.9 (51.8–99.7)       | 14.3 (1.8–42.8)        | 40.0 (19.1–63.9) | 66.7 (9.4–99.2)  |
| Watery stool and dehydration and ≤ 9 stools in the last 24 hours          | 44.4 (13.7–78.8)       | 50.0 (11.8–88.2)       | 57.1 (18.4–90.1) | 37.5 (8.5–75.5)  |
| Watery stool and dehydration and (10–25) stools in the last 24 hours      | 42.9 (9.9–81.6)        | 50.0 (6.8–93.2)        | 60.0 (14.7–94.7) | 33.3 (4.3–77.7)  |
| Watery stool and (dehydration or vomiting)                                | 88.9 (51.8–99.7)       | 0.0 (0.0–23.2)         | 36.4 (17.2–59.3) | 0.0 (0.0–97.5)   |
| Watery stool and (dehydration or rice water stools)                       | 88.9 (51.8–99.7)       | 0.0 (0.0–24.7)         | 38.1 (20.3–66.5) | 0.0 (0.0–97.5)   |
| Watery stool and (dehydration or rice water stools and vomiting)          | 85.7 (42.1–99.6)       | 0.0 (0.0–30.8)         | 37.5 (18.1–61.6) | 0.0 (0.0–97.5)   |
| Watery stool and vomiting and dry mucous membranes                        | NA                     | NA                     | NA               | NA               |
| Rice water stools                                                         | 54.5 (23.4–83.3)       | 42.1 (20.3–66.5)       | 35.3 (14.2–61.7) | 61.5 (14.2–86.1) |
| Rice water stools and dehydration                                         | 44.5 (13.7–78.8)       | 33.3 (11.8–61.6)       | 28.6 (8.4–58.1)  | 50.0 (18.7–81.3) |
| Rice water stools and vomiting                                            | 44.4 (13.7–78.8)       | 53.8 (25.1–80.8)       | 40.0 (12.2–73.8) | 58.3 (27.7–84.8) |
| Rice water stools and ≤ 9 stools in the last 24 hours                     | 33.3 (7.5–70.1)        | 50.0 (11.8–88.2)       | 50.0 (11.8–88.2) | 33.3 (7.5–70.1)  |
| Rice water stools and (10–25) stools in the last 24 hours                 | 33.3 (7.5–70.1)        | 66.7 (22.3–95.7)       | 60.0 (14.7–94.7) | 40.0 (12.2–73.8) |
| Rice water stools and dry mucous membranes                                | NA                     | NA                     | NA               | NA               |
| Rice water stools and dehydration and vomiting                            | 28.6 (3.7–71.0)        | 58.3 (27.7–84.8)       | 28.6 (3.7–71.0)  | 58.3 (27.7–84.8) |
| Rice water stools and dehydration and ≤ 9 stools in the last 24 hours     | 20.0 (0.5–71.6)        | 60.0 (14.7–94.7)       | 33.3 (0.8–90.6)  | 42.9 (9.9–81.6)  |
| Rice water stools and dehydration and (10–25) stools in the last 24 hours | 33.3 (7.5–70.1)        | 60.0 (14.7–94.7)       | 60.0 (14.7–94.7) | 33.3 (7.5–70.1)  |
| Rice water stools and vomiting and dry mucous membranes                   | NA                     | NA                     | NA               | NA               |

CI = confidence interval; NA = not applicable; NPV = negative predictive value; PPV = positive predictive value.

SUPPLEMENTAL TABLE 12

Sensitivity, specificity, PPV, and NPV for tested cases aged more than 5 years in the enhanced surveillance zones

| Case definition                                                            | Sensitivity % (95% CI) | Specificity % (95% CI) | PPV % (95% CI)   | NPV % (95% CI)   |
|----------------------------------------------------------------------------|------------------------|------------------------|------------------|------------------|
| World Health Organization epidemic cholera definition                      | 97.8 (96.9–98.6)       | 6.5 (5.4–7.6)          | 35.3 (33.6–37.0) | 85.2 (78.6–90.4) |
| Watery stool and dehydration                                               | 93.0 (91.3–94.5)       | 15.9 (14.3–17.6)       | 37.4 (35.5–39.3) | 80.8 (76.5–84.7) |
| Watery stool and vomiting                                                  | 90.4 (88.5–92.1)       | 20.6 (18.9–22.5)       | 37.9 (36.0–39.8) | 80.1 (76.3–83.5) |
| Watery stool and $\leq 9$ stools in the last 24 hours                      | 47.7 (44.5–50.8)       | 50.9 (48.6–53.2)       | 34.5 (32.0–37.1) | 64.2 (61.6–66.6) |
| Watery stool and (10–25) stools in the last 24 hours                       | 50.7 (47.5–53.9)       | 52.8 (50.5–55.1)       | 36.9 (34.3–39.5) | 66.3 (63.9–68.8) |
| Watery stool and dry mucous membranes                                      | 74.6 (71.7–77.3)       | 31.1 (28.9–33.3)       | 37.0 (34.9–39.2) | 69.2 (65.9–72.4) |
| Watery stool and dehydration and vomiting                                  | 86.5 (84.3–88.5)       | 25.1 (23.2–27.1)       | 38.6 (36.6–40.6) | 77.5 (74.0–80.7) |
| Watery stool and dehydration and $\leq 9$ stools in the last 24 hours      | 46.9 (43.6–50.1)       | 57.8 (55.4–60.2)       | 38.2 (35.3–41.1) | 66.2 (63.7–68.6) |
| Watery stool and dehydration and (10–25) stools in the last 24 hours       | 47.2 (44.2–50.3)       | 56.7 (54.4–58.9)       | 37.1 (34.5–39.7) | 66.5 (64.2–68.8) |
| Watery stool and (dehydration or vomiting)                                 | 97.5 (96.4–98.4)       | 10.4 (9.1–11.9)        | 37.1 (35.3–39.0) | 88.4 (83.5–92.3) |
| Watery stool and (dehydration or rice water stools)                        | 96.6 (95.3–97.6)       | 14.3 (12.8–16.0)       | 38.1 (36.2–40.0) | 88.6 (84.5–91.9) |
| Watery stool and (dehydration or rice water stools or vomiting)            | 98.0 (96.9–98.7)       | 10.2 (8.8–11.6)        | 37.5 (35.6–39.3) | 90.1 (85.3–93.8) |
| Watery stool and vomiting and dry mucous membranes                         | 70.1 (67.1–73.0)       | 38.0 (35.7–40.3)       | 38.2 (35.9–40.5) | 70.0 (67.0–72.9) |
| Rice water stools                                                          | 80.5 (77.9–82.8)       | 34.6 (32.5–36.7)       | 39.5 (37.4–41.6) | 76.9 (74.0–79.6) |
| Rice water stools and dehydration                                          | 77.6 (74.9–80.1)       | 33.8 (31.7–36.0)       | 39.0 (36.9–41.1) | 73.5 (70.4–76.4) |
| Rice water stools and vomiting                                             | 75.1 (72.4–77.7)       | 40.0 (37.8–42.2)       | 40.6 (38.4–42.8) | 74.6 (71.9–77.3) |
| Rice water stools and $\leq 9$ stools in the last 24 hours                 | 38.0 (35.0–41.1)       | 72.4 (70.3–74.5)       | 43.0 (39.7–49.4) | 68.1 (65.9–70.1) |
| Rice water stools and (10–25) stools in the last 24 hours                  | 43.5 (40.4–46.7)       | 58.8 (56.5–61.1)       | 36.7 (33.9–39.5) | 65.5 (63.1–67.8) |
| Rice water stools and dry mucous membranes                                 | 62.7 (59.6–69.8)       | 43.4 (41.1–45.8)       | 37.8 (35.4–40.2) | 68.0 (65.2–70.7) |
| Rice water stools and dehydration and vomiting                             | 72.5 (69.7–75.2)       | 40.4 (38.2–42.7)       | 40.0 (37.8–42.3) | 72.8 (70.0–75.5) |
| Rice water stools and dehydration and $\leq 9$ stools in the last 24 hours | 38.4 (35.2–41.7)       | 68.6 (66.2–70.9)       | 42.2 (38.8–45.6) | 65.1 (62.7–67.4) |
| Rice water stools and dehydration and (10–25) stools in the last 24 hours  | 40.1 (37.1–43.1)       | 63.8 (61.7–65.9)       | 36.5 (33.7–39.3) | 67.2 (65.1–69.3) |
| Rice water stools and vomiting and dry mucous membranes                    | 59.9 (56.8–63.0)       | 48.6 (46.3–51.0)       | 39.0 (36.5–41.5) | 68.9 (66.2–71.4) |

CI = confidence interval; NPV = negative predictive value; PPV = positive predictive value.

SUPPLEMENTAL TABLE 13

Sensitivity, specificity, PPV, and NPV for tested cases aged between 1 and 4 years in the enhanced surveillance zones

| Case definition                                                           | Sensitivity % (95% CI) | Specificity % (95% CI) | PPV % (95% CI)   | NPV % (95% CI)   |
|---------------------------------------------------------------------------|------------------------|------------------------|------------------|------------------|
| World Health Organization epidemic cholera definition                     | 97.7 (95.5–99.0)       | 5.3 (3.7–7.3)          | 35.7 (32.6–38.8) | 81.0 (65.9–91.4) |
| Watery stool and dehydration                                              | 95.6 (92.8–97.5)       | 18.3 (15.4–21.6)       | 38.9 (35.6–42.3) | 88.5 (81.7–93.4) |
| Watery stool and vomiting                                                 | 87.8 (83.9–91.1)       | 23.4 (20.1–26.9)       | 38.7 (35.2–42.2) | 77.7 (71.0–83.4) |
| Watery stool and ≤ 9 stools in the last 24 hours                          | 49.6 (44.1–55.0)       | 45.3 (41.3–49.3)       | 33.3 (29.2–37.6) | 62.0 (57.3–66.5) |
| Watery stool and (10–25) stools in the last 24 hours                      | 49.0 (43.5–54.4)       | 58.5 (54.5–62.4)       | 39.4 (34.7–44.2) | 67.5 (63.4–71.5) |
| Watery stool and dry mucous membranes                                     | 64.3 (58.9–69.5)       | 49.0 (44.5–53.5)       | 45.3 (40.7–49.9) | 67.7 (62.6–72.5) |
| Watery stool and dehydration and vomiting                                 | 85.9 (81.7–89.4)       | 28.2 (24.7–32.0)       | 39.8 (36.2–43.2) | 78.4 (72.4–83.6) |
| Watery stool and dehydration and ≤ 9 stools in the last 24 hours          | 48.2 (42.7–53.7)       | 58.6 (54.6–62.6)       | 38.9 (34.2–43.8) | 67.4 (63.2–71.4) |
| Watery stool and dehydration and (10–25) stools in the last 24 hours      | 48.2 (42.0–53.7)       | 58.7 (54.7–62.7)       | 39.4 (34.7–44.3) | 67.0 (62.9–71.0) |
| Watery stool and (dehydration or vomiting)                                | 97.9 (95.8–99.2)       | 12.9 (10.4–15.8)       | 38.0 (34.8–41.3) | 92.0 (84.3–96.7) |
| Watery stool and (dehydration or rice water stools)                       | 97.6 (95.4–99.0)       | 19.6 (16.6–22.9)       | 39.6 (36.3–43.0) | 93.9 (88.3–97.3) |
| Watery stool and (dehydration or rice water stools or vomiting)           | 98.2 (96.2–99.3)       | 13.0 (10.4–15.9)       | 38.2 (35.0–41.5) | 93.0 (85.4–97.4) |
| Watery stool and vomiting and dry mucous membranes                        | 57.8 (52.2–63.2)       | 61.9 (57.8–65.8)       | 45.5 (40.7–50.5) | 72.7 (68.6–76.5) |
| Rice water stools                                                         | 83.3 (79.0–87.1)       | 28.9 (25.4–32.6)       | 38.8 (35.2–42.4) | 76.3 (70.4–81.5) |
| Rice water stools and dehydration                                         | 81.7 (77.2–85.7)       | 28.4 (24.9–32.1)       | 38.4 (34.9–42.1) | 73.9 (67.9–79.4) |
| Rice water stools and vomiting                                            | 74.5 (69.5–79.0)       | 35.1 (31.3–39.0)       | 38.8 (35.0–42.6) | 71.4 (65.9–76.4) |
| Rice water stools and ≤ 9 stools in the last 24 hours                     | 38.9 (33.7–44.4)       | 65.7 (61.7–69.5)       | 38.5 (33.2–43.9) | 66.1 (62.2–69.9) |
| Rice water stools and (10–25) stools in the last 24 hours                 | 45.5 (40.1–50)         | 61.7 (57.7–65.6)       | 39.6 (34.7–44.7) | 67.3 (63.2–71.2) |
| Rice water stools and dry mucous membranes                                | 53.8 (48.3–59.3)       | 53.0 (48.5–57.5)       | 43.1 (38.3–48.1) | 63.4 (58.6–68.1) |
| Rice water stools and dehydration and vomiting                            | 73.1 (68.0–77.7)       | 34.8 (31.0–38.7)       | 38.3 (34.5–42.2) | 70.0 (64.5–75.1) |
| Rice water stools and dehydration and ≤ 9 stools in the last 24 hours     | 40.7 (35.2–46.2)       | 64.2 (60.2–68.6)       | 37.8 (32.5–43.2) | 67.0 (62.9–70.9) |
| Rice water stools and dehydration and (10–25) stools in the last 24 hours | 42.0 (36.8–47.3)       | 63.2 (59.3–67.0)       | 39.4 (34.5–44.5) | 65.6 (61.7–69.4) |
| Rice water stools and vomiting and dry mucous membranes                   | 48.5 (42.9–54.0)       | 64.9 (60.8–68.7)       | 43.3 (38.1–48.5) | 69.5 (65.4–73.3) |

CI = confidence interval; NPV = negative predictive value; PPV = positive predictive value.

SUPPLEMENTAL TABLE 14  
Sensitivity, specificity, PPV, and NPV for tested cases aged more than 5 years in outbreak sites

| Case definition                                                           | Sensitivity % (95% CI) | Specificity % (95% CI) | PPV % (95% CI)   | NPV % (95% CI)   |
|---------------------------------------------------------------------------|------------------------|------------------------|------------------|------------------|
| World Health Organization epidemic cholera definition                     | 75.8 (70.7–80.4)       | 15.8 (12.5–19.6)       | 39.9 (36.0–43.9) | 46.9 (38.7–55.3) |
| Watery stool and dehydration                                              | 87.9 (82.8–91.9)       | 25.8 (21.1–30.8)       | 43.5 (38.8–48.4) | 76.6 (67.6–84.1) |
| Watery stool and vomiting                                                 | 81.1 (75.3–86.0)       | 22.7 (18.4–27.5)       | 40.4 (35.9–45.2) | 65.0 (55.8–73.5) |
| Watery stool and ≤ 9 stools in the last 24 hours                          | 69.7 (62.6–76.2)       | 23.8 (18.9–29.2)       | 37.9 (32.7–43.2) | 54.0 (44.9–63.0) |
| Watery stool and (10–25) stools in the last 24 hours                      | 27.7 (21.4–34.6)       | 80.1 (75.0–84.6)       | 48.1 (38.4–58.0) | 62.4 (57.2–67.4) |
| Watery stool and dry mucous membranes                                     | 53.6 (44.5–62.6)       | 56.7 (50.2–63.1)       | 39.4 (32.0–47.2) | 69.9 (62.9–76.3) |
| Watery stool and dehydration and vomiting                                 | 76.6 (70.2–82.2)       | 35.6 (30.3–41.2)       | 43.9 (38.6–49.2) | 69.8 (62.0–76.8) |
| Watery stool and dehydration and ≤ 9 stools in the last 24 hours          | 46.4 (39.9–53.0)       | 60.2 (54.9–65.3)       | 43.9 (37.6–50.2) | 62.6 (57.3–67.8) |
| Watery stool and dehydration and (10–25) stools in the last 24 hours      | 41.9 (32.3–51.9)       | 73.1 (65.4–79.9)       | 51.2 (40.1–62.1) | 65.1 (57.6–72.2) |
| Watery stool and (dehydration or vomiting)                                | 92.7 (88.2–95.8)       | 12.5 (9.0–16.7)        | 41.0 (36.5–45.7) | 72.2 (58.4–83.5) |
| Watery stool and (dehydration or rice water stools)                       | 92.4 (88.0–95.6)       | 16.0 (12.1–20.4)       | 41.6 (37.1–46.2) | 76.5 (64.6–85.9) |
| Watery stool and (dehydration or rice water stools or vomiting)           | 93.0 (88.6–96.1)       | 9.1 (6.1–12.9)         | 40.0 (35.6–44.6) | 66.7 (50.5–80.4) |
| Watery stool and vomiting and dry mucous membranes                        | 50.8 (41.7–59.9)       | 61.7 (55.2–67.9)       | 41.2 (33.3–49.4) | 70.4 (63.6–76.5) |
| Rice water stools                                                         | 55.8 (50.2–61.4)       | 46.2 (41.4–51.0)       | 43.3 (38.4–48.2) | 58.7 (53.3–64.0) |
| Rice water stools and dehydration                                         | 65.9 (59.1–72.2)       | 49.4 (43.9–54.9)       | 45.3 (39.6–51.0) | 45.3 (63.2–75.3) |
| Rice water stools and vomiting                                            | 65.1 (58.4–71.4)       | 48.2 (42.8–53.7)       | 44.5 (39.0–50.2) | 68.5 (62.2–74.3) |
| Rice water stools and ≤ 9 stools in the last 24 hours                     | 52.7 (45.2–60.1)       | 51.6 (45.6–57.6)       | 41.8 (35.4–48.4) | 62.3 (55.7–68.6) |
| Rice water stools and (10–25) stools in the last 24 hours                 | 22.8 (17.0–29.6)       | 84.2 (79.4–88.3)       | 48.8 (37.9–59.9) | 62.3 (57.2–67.2) |
| Rice water stools and dry mucous membranes                                | 46.8 (37.8–55.9)       | 65.5 (59.1–71.6)       | 41.4 (33.2–50.1) | 70.3 (63.8–76.2) |
| Rice water stools and dehydration and vomiting                            | 62.2 (55.1–68.9)       | 54.8 (49.1–60.4)       | 46.8 (40.7–53.0) | 69.4 (63.2–75.0) |
| Rice water stools and dehydration and ≤ 9 stools in the last 24 hours     | 39.2 (32.6–46.0)       | 69.7 (64.3–74.8)       | 47.2 (39.8–54.8) | 62.4 (57.1–67.5) |
| Rice water stools and dehydration and (10–25) stools in the last 24 hours | 29.9 (21.8–39.1)       | 82.6 (76.5–87.7)       | 51.5 (39.0–63.8) | 65.7 (59.3–71.7) |
| Rice water stools and vomiting and dry mucous membranes                   | 43.9 (35.0–53.1)       | 69.8 (63.5–75.6)       | 43.2 (34.4–52.4) | 70.4 (64.1–76.2) |

CI = confidence interval; NPV = negative predictive value; PPV = positive predictive value.

SUPPLEMENTAL TABLE 15

Sensitivity, specificity, PPV, and NPV for tested cases aged between 1 and 4 years in outbreak sites

| Case definition                                                           | Sensitivity % (95% CI) | Specificity % (95% CI) | PPV % (95% CI)   | NPV % (95% CI)   |
|---------------------------------------------------------------------------|------------------------|------------------------|------------------|------------------|
| World Health Organization epidemic cholera definition                     | 62.9 (44.9–78.5)       | 23.1 (11.1–39.3)       | 42.3 (28.7–56.8) | 40.9 (20.7–63.6) |
| Watery stool and dehydration                                              | 85.0 (62.1–96.8)       | 34.5 (17.9–54.3)       | 47.2 (30.4–64.5) | 76.9 (46.2–95.0) |
| Watery stool and vomiting                                                 | 90.5 (69.6–98.8)       | 20.0 (7.7–38.6)        | 44.2 (29.1–60.1) | 75.0 (34.9–96.8) |
| Watery stool and ≤ 9 stools in the last 24 hours                          | 66.7 (41.0–86.7)       | 22.7 (7.8–45.4)        | 41.4 (23.5–61.1) | 45.5 (16.7–76.6) |
| Watery stool and (10–25) stools in the last 24 hours                      | 27.8 (9.7–53.5)        | 86.4 (65.1–97.1)       | 62.5 (24.5–91.5) | 59.4 (40.6–76.3) |
| Watery stool and dry mucous membranes                                     | 45.5 (16.7–76.6)       | 55.6 (30.8–78.5)       | 38.5 (13.9–68.4) | 62.5 (35.4–84.8) |
| Watery stool and dehydration and vomiting                                 | 77.8 (52.4–93.6)       | 39.3 (21.5–59.4)       | 45.2 (27.3–64.0) | 73.3 (44.9–92.2) |
| Watery stool and dehydration and ≤ 9 stools in the last 24 hours          | 42.1 (20.3–66.5)       | 65.4 (44.3–82.8)       | 47.1 (23.0–72.2) | 60.7 (40.6–78.5) |
| Watery stool and dehydration and (10–25) stools in the last 24 hours      | 38.5 (13.9–68.4)       | 78.6 (49.2–95.3)       | 62.5 (24.5–91.5) | 57.9 (33.5–79.7) |
| Watery stool and (dehydration or vomiting)                                | 94.4 (72.7–99.9)       | 14.3 (4.0–32.7)        | 41.5 (26.3–57.9) | 80.0 (28.4–99.5) |
| Watery stool and (dehydration or rice water stools)                       | 89.5 (66.9–98.7)       | 17.2 (5.8–35.8)        | 41.5 (26.3–57.9) | 71.4 (29.0–96.3) |
| Watery stool and (dehydration or rice water stools or vomiting)           | 94.1 (71.3–99.9)       | 10.7 (2.3–28.2)        | 39.0 (24.2–55.5) | 75.0 (19.4–99.4) |
| Watery stool and vomiting and dry mucous membranes                        | 45.5 (16.7–76.6)       | 52.9 (27.8–77.0)       | 38.5 (13.9–68.4) | 60.0 (32.3–83.7) |
| Rice water stools                                                         | 38.2 (22.2–56.4)       | 53.7 (37.4–69.3)       | 40.6 (23.7–59.4) | 51.2 (35.5–66.7) |
| Rice water stools and dehydration                                         | 52.6 (28.9–75.6)       | 61.3 (42.2–78.2)       | 45.5 (24.4–67.8) | 67.9 (47.6–84.1) |
| Rice water stools and vomiting                                            | 55.0 (31.5–76.9)       | 51.6 (33.1–68.9)       | 42.3 (23.4–63.1) | 64.0 (42.5–82.0) |
| Rice water stools and ≤ 9 stools in the last 24 hours                     | 50.0 (26.0–74.0)       | 50.0 (28.2–71.8)       | 45.0 (23.1–68.5) | 55.0 (31.5–76.9) |
| Rice water stools and (10–25) stools in the last 24 hours                 | 22.2 (6.4–47.6)        | 90.9 (70.8–98.9)       | 66.7 (22.3–95.7) | 58.8 (40.7–75.4) |
| Rice water stools and dry mucous membranes                                | 36.4 (10.9–69.2)       | 68.4 (43.4–87.4)       | 40.0 (12.2–73.8) | 65.0 (40.8–84.6) |
| Rice water stools and dehydration and vomiting                            | 47.1 (23.0–72.2)       | 69.0 (49.2–84.7)       | 47.1 (23.0–72.2) | 69.0 (49.2–84.7) |
| Rice water stools and dehydration and ≤ 9 stools in the last 24 hours     | 33.3 (13.3–59.0)       | 78.3 (56.3–92.5)       | 54.5 (23.4–83.3) | 60.0 (40.6–77.3) |
| Rice water stools and dehydration and (10–25) stools in the last 24 hours | 28.6 (8.4–58.1)        | 88.2 (63.6–98.5)       | 66.7 (22.3–95.7) | 60.0 (38.7–78.9) |
| Rice water stools and vomiting and dry mucous membranes                   | 36.4 (10.9–69.2)       | 66.7 (41.0–86.7)       | 40.0 (12.2–73.8) | 63.2 (38.4–83.7) |

CI = confidence interval; NPV = negative predictive value; PPV = positive predictive value.

SUPPLEMENTAL TABLE 16

Sensitivity, specificity, PPV, and NPV for the World Health Organization case definition; children aged 1–4, 1–3, and 1–2

| Case definition | Sensitivity % (95% CI) | Specificity % (95% CI) | PPV % (95% CI)   | NPV % (95% CI)   |
|-----------------|------------------------|------------------------|------------------|------------------|
| Less than 5     | 92.7 (91.2–94.0)       | 8.1 (7.1–9.3)          | 36.1 (34.5–37.7) | 66.6 (60.9–71.9) |
| Less than 4     | 94.4 (91.1–96.8)       | 6.6 (4.7–9.0)          | 34.3 (31.0–37.1) | 69.8 (55.7–81.7) |
| Less than 3     | 93.4 (88.5–96.7)       | 6.7 (4.4–9.5)          | 29.2 (25.3–33.2) | 71.1 (54.1–84.6) |
| Less than 2     | 90.9 (80.0–97.0)       | 8.6 (5.0–13.7)         | 22.8 (17.4–29.0) | 76.2 (52.8–91.8) |

CI = confidence interval; NPV = negative predictive value; PPV = positive predictive value.

SUPPLEMENTAL TABLE 17

Sensitivity, specificity, PPV, and NPV of country specific case definitions

| Case definition | Sensitivity % (95% CI) | Specificity % (95% CI) | PPV % (95% CI)   | NPV % (95% CI)     |
|-----------------|------------------------|------------------------|------------------|--------------------|
| Côte d'Ivoire   | 46.5 (31.2–62.3)       | 56.8 (45.3–67.8)       | 36.4 (23.8–50.4) | 66.7 (54.3–77.6)   |
| DRC             | 94.8 (93.3–96.0)       | 7.7 (6.6–9.0)          | 35.7 (33.9–37.4) | 73.5 (66.8–79.1)   |
| Guinea          | 95.7 (89.5–98.8)       | 8.6 (4.8–14.0)         | 37.7 (31.5–44.1) | 77.8 (52.4–93.6)   |
| Mozambique      | 100.0 (91.8–100.0)     | 4.1 (2.0–7.5)          | 15.7 (11.6–20.6) | 100.0 (69.2–100.0) |
| Tanzania        | 92.3 (79.1–98.4)       | 16.7 (4.7–37.4)        | 64.3 (50.4–76.6) | 57.1 (18.4–90.1)   |
| Togo            | 87.5 (83.0–91.2)       | 63.0 (56.6–69.1)       | 72.4 (67.3–77.2) | 82.0 (75.8–87.2)   |
| Uganda          | 91.3 (82.8–96.4)       | 4.1 (1.8–8.2)          | 28.2 (22.8–34.1) | 53.3 (26.6–78.7)   |

CI = confidence interval; DRC = Democratic Republic of Congo; NPV = negative predictive value; PPV = positive predictive value.
